# Supplementary material
Source: PubMed Central journal article supplement (PMC8957077)

Supplementary Figure S1

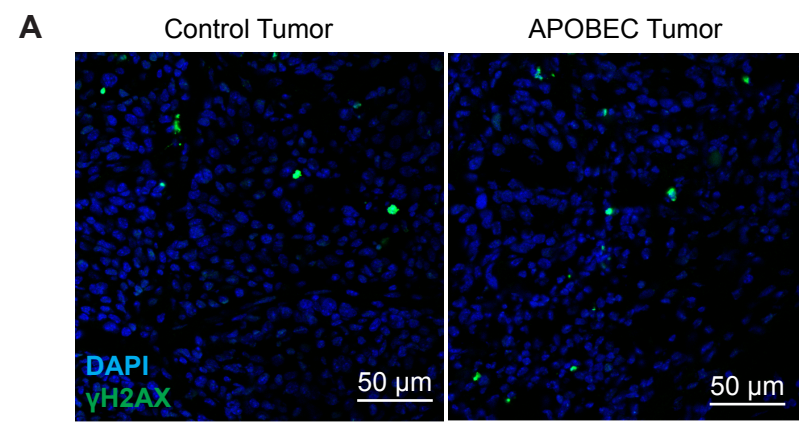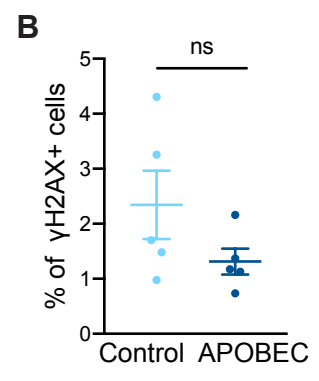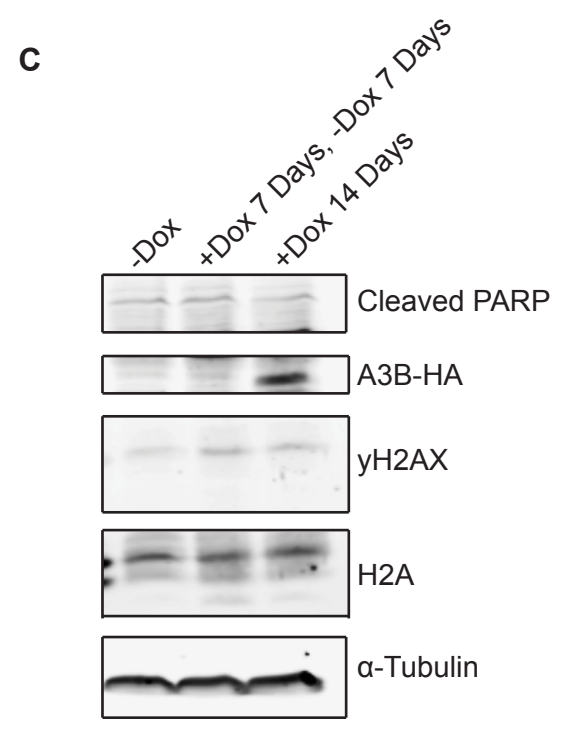

A

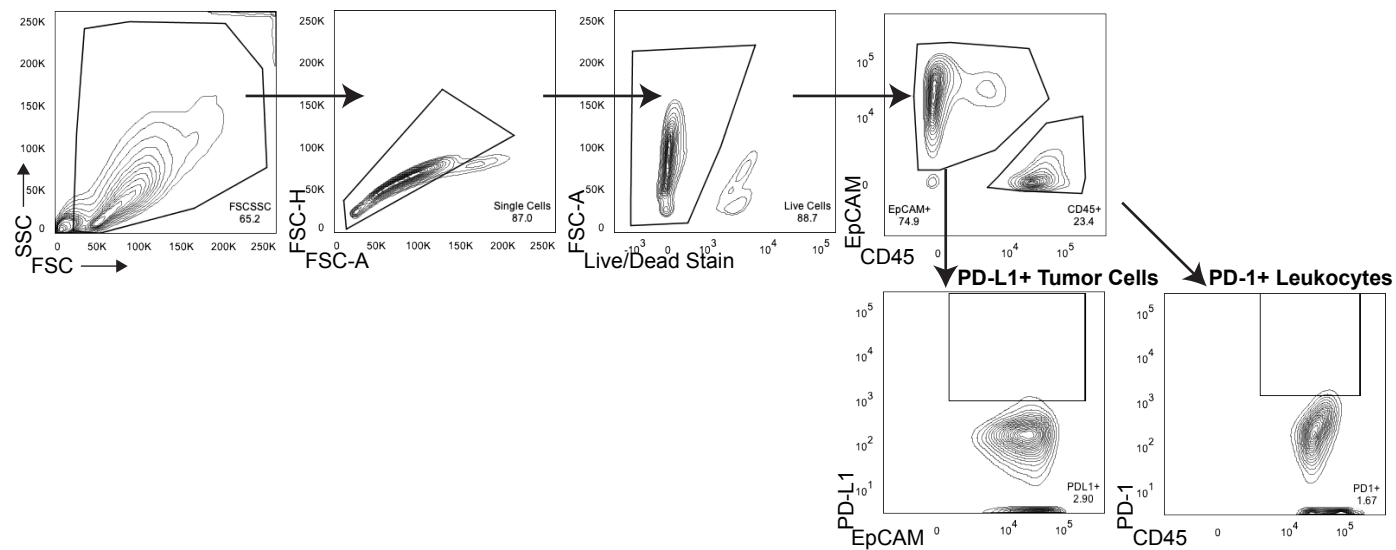

B

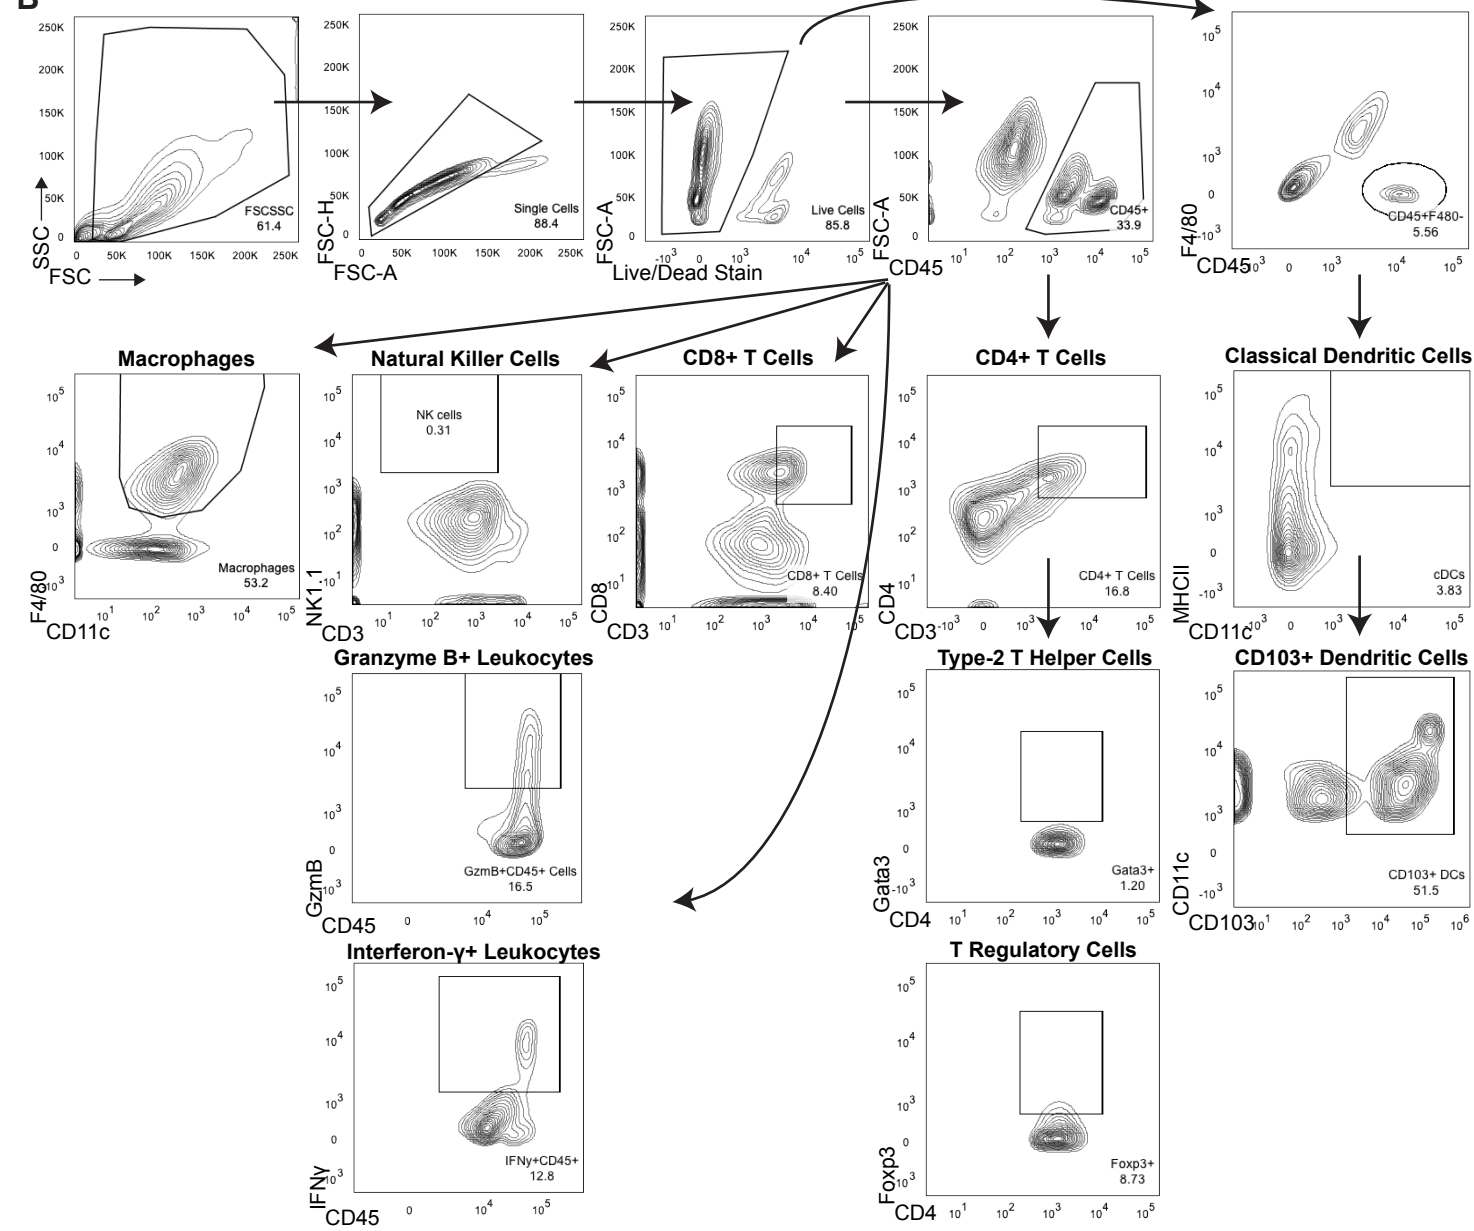

Supplementary Figure S3

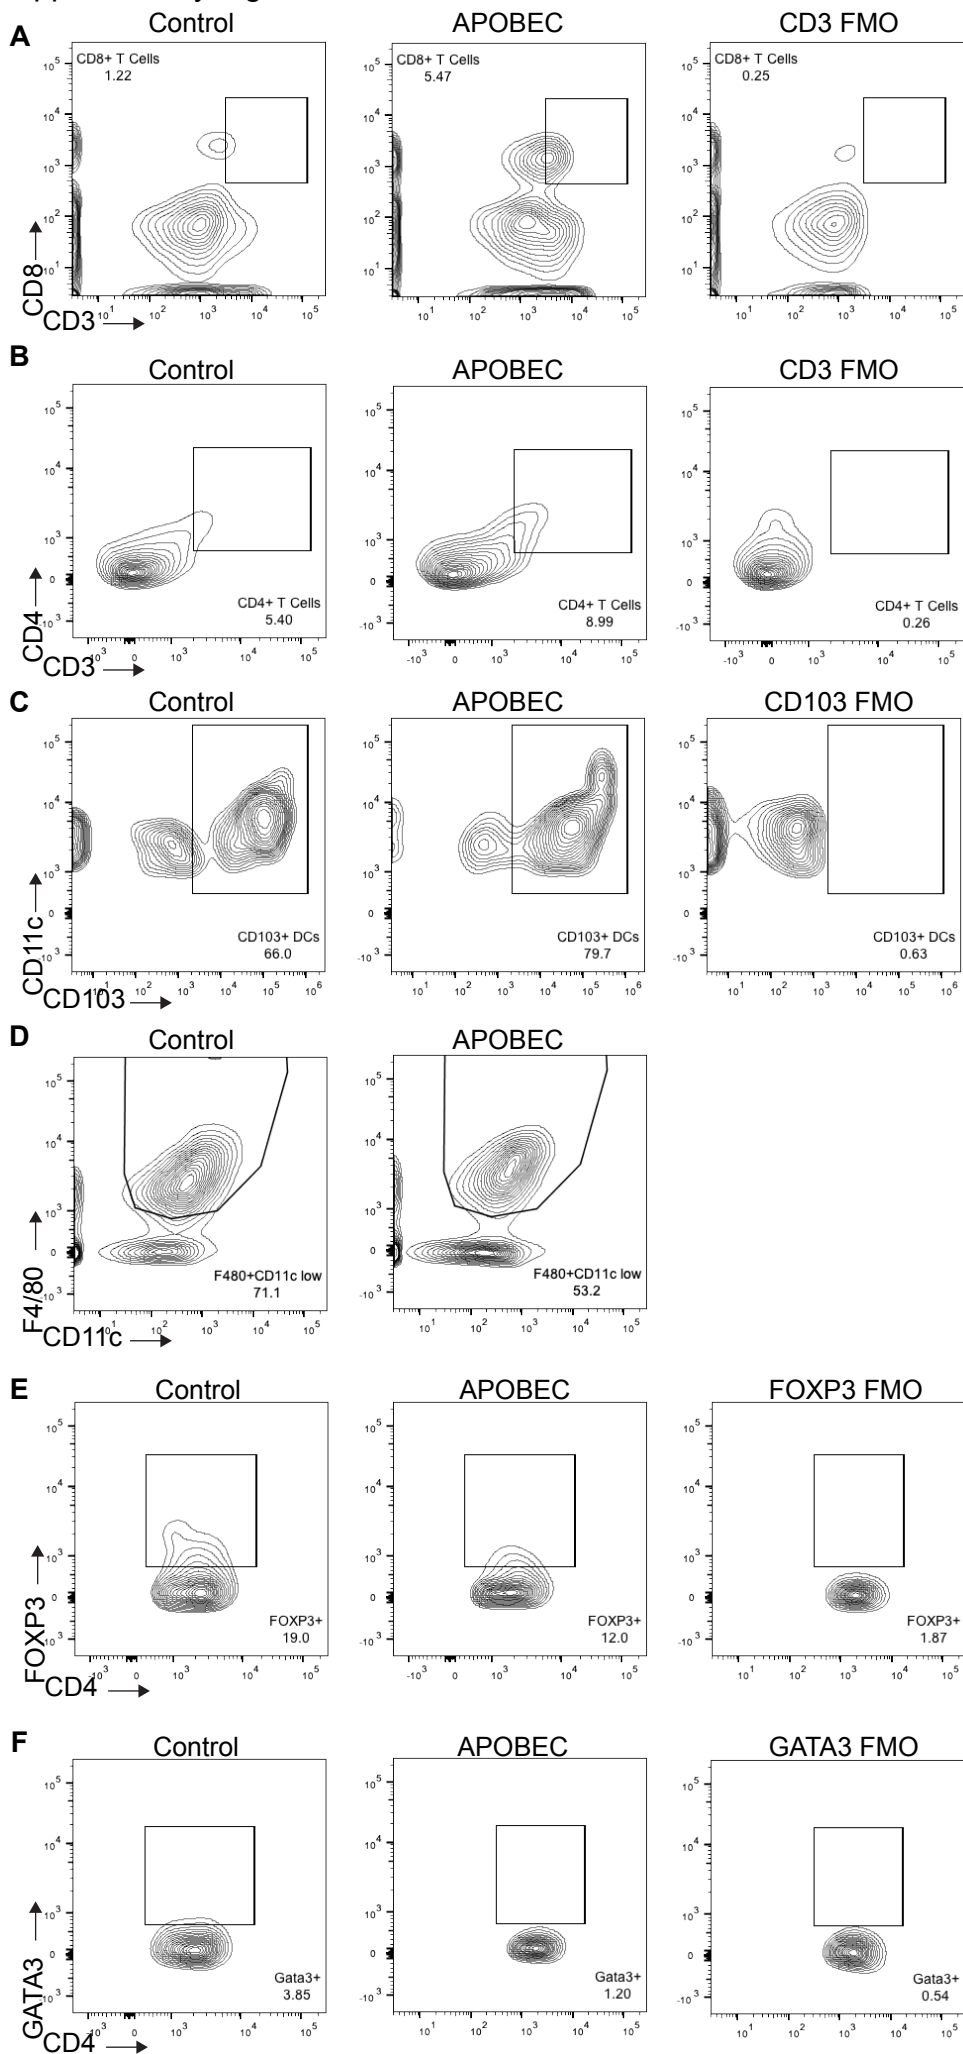

Supplementary Figure S4

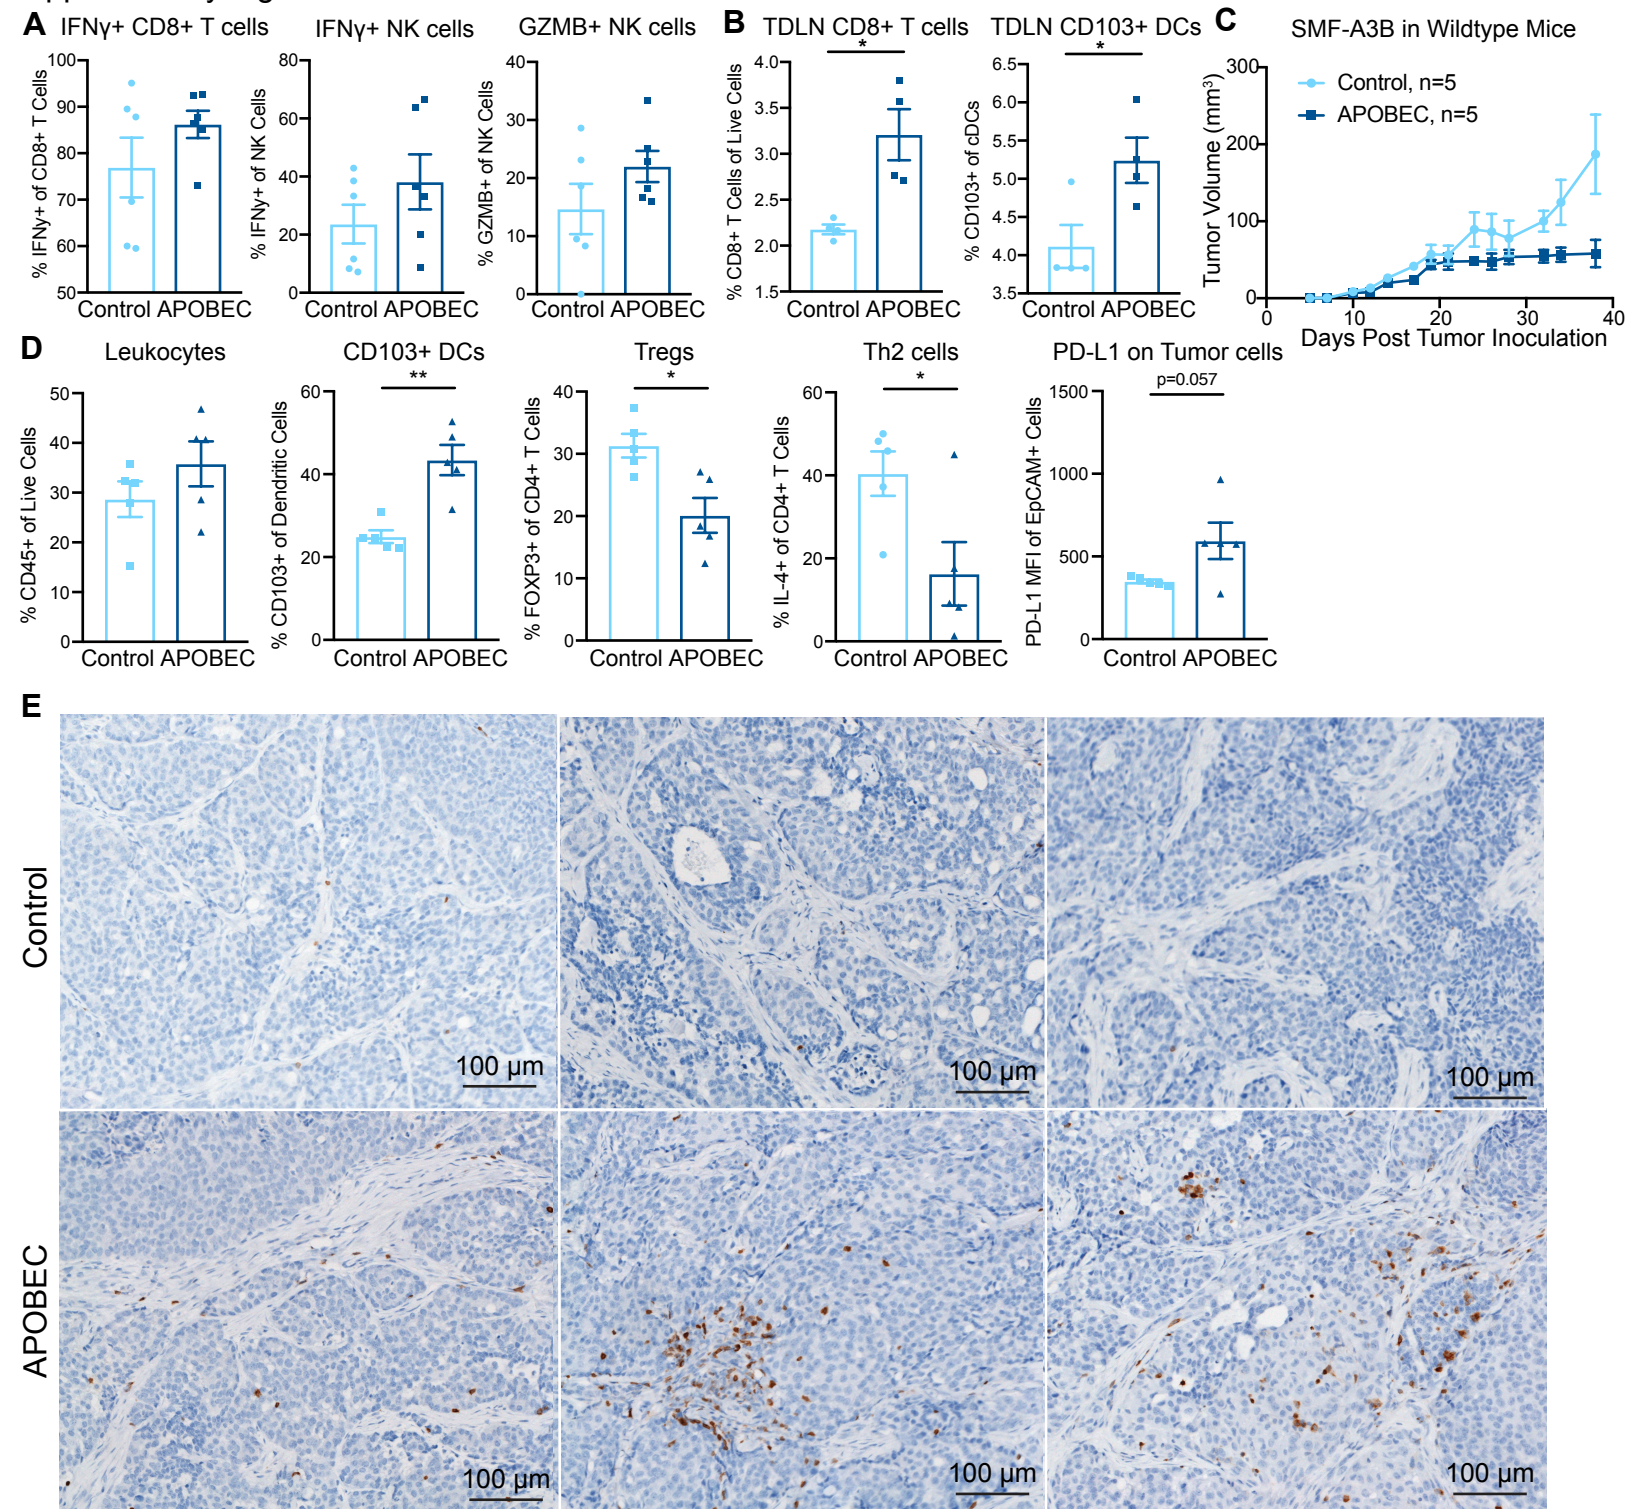

Supplementary Figure S5

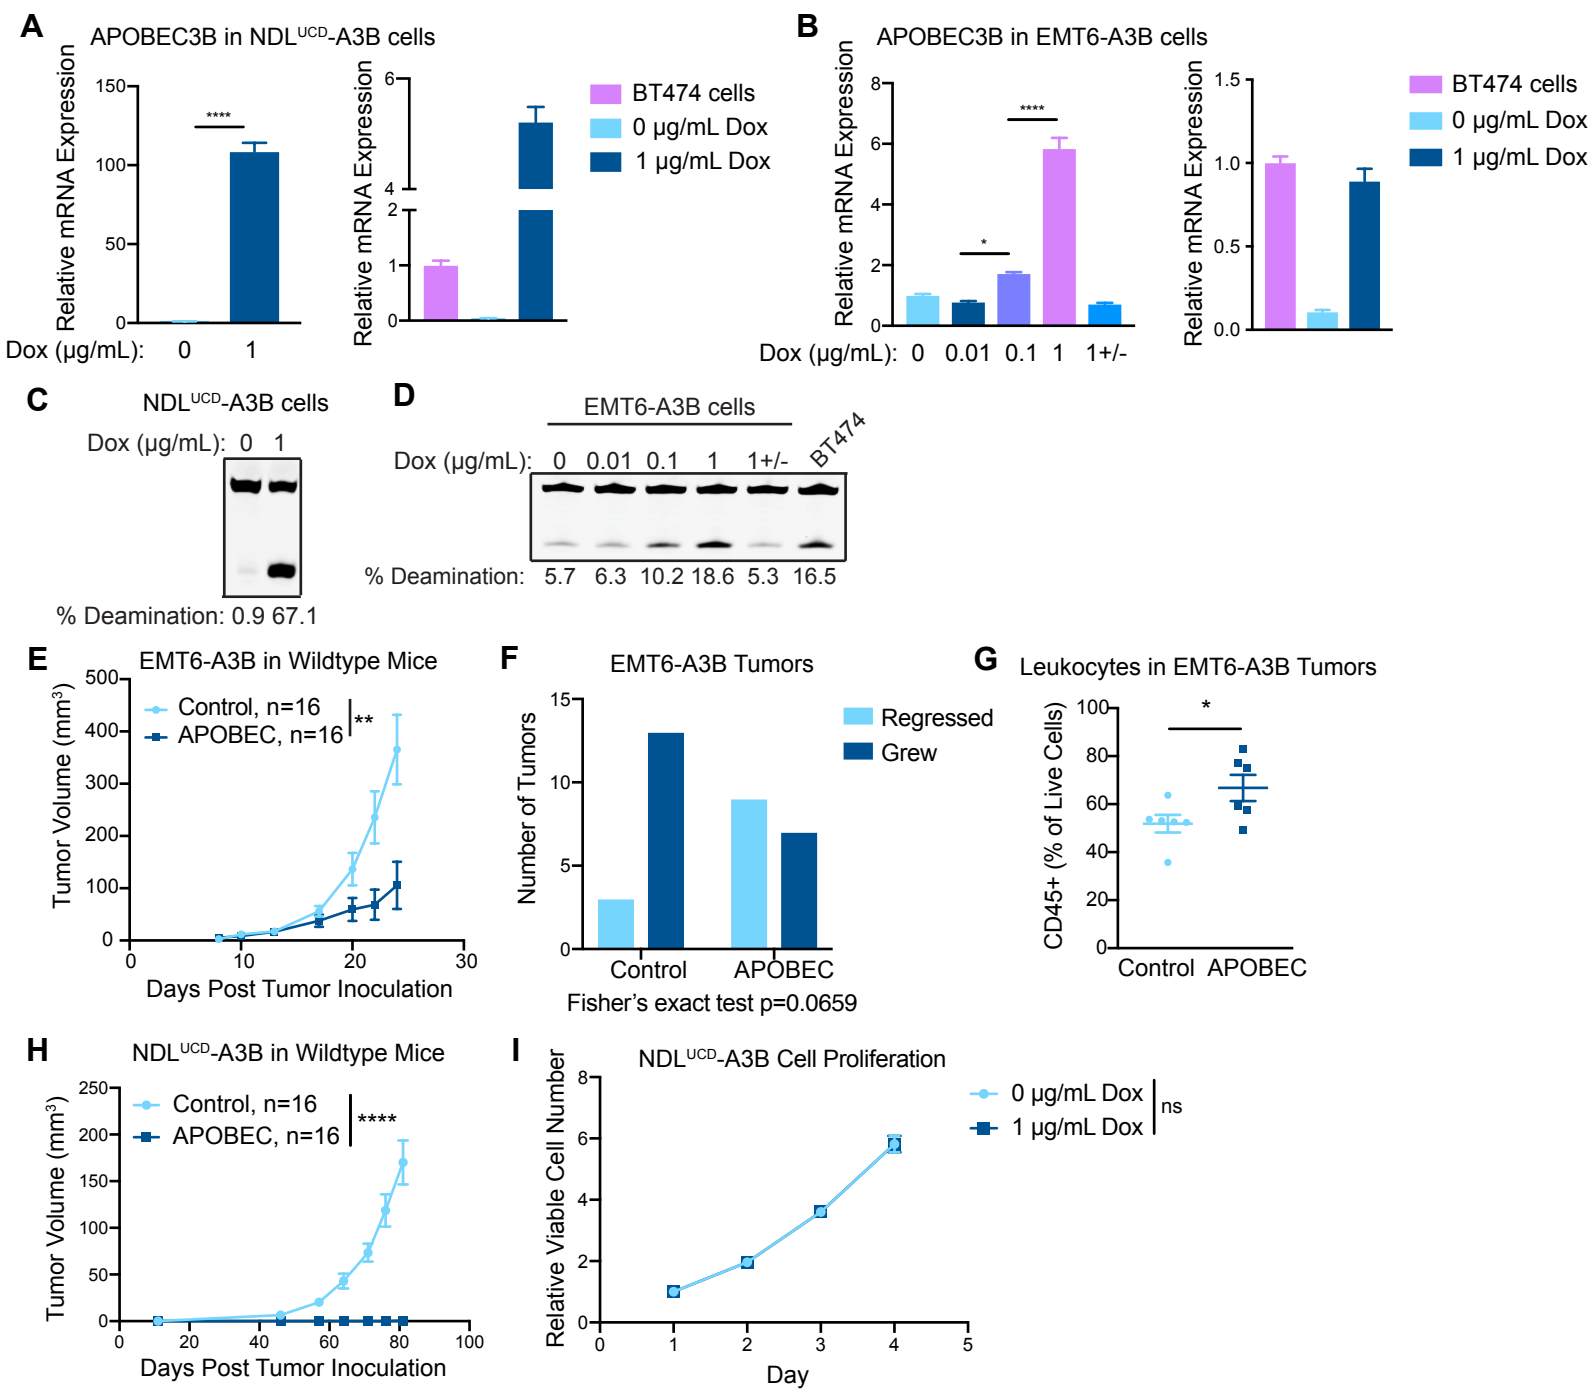

# Supplementary Figure S6

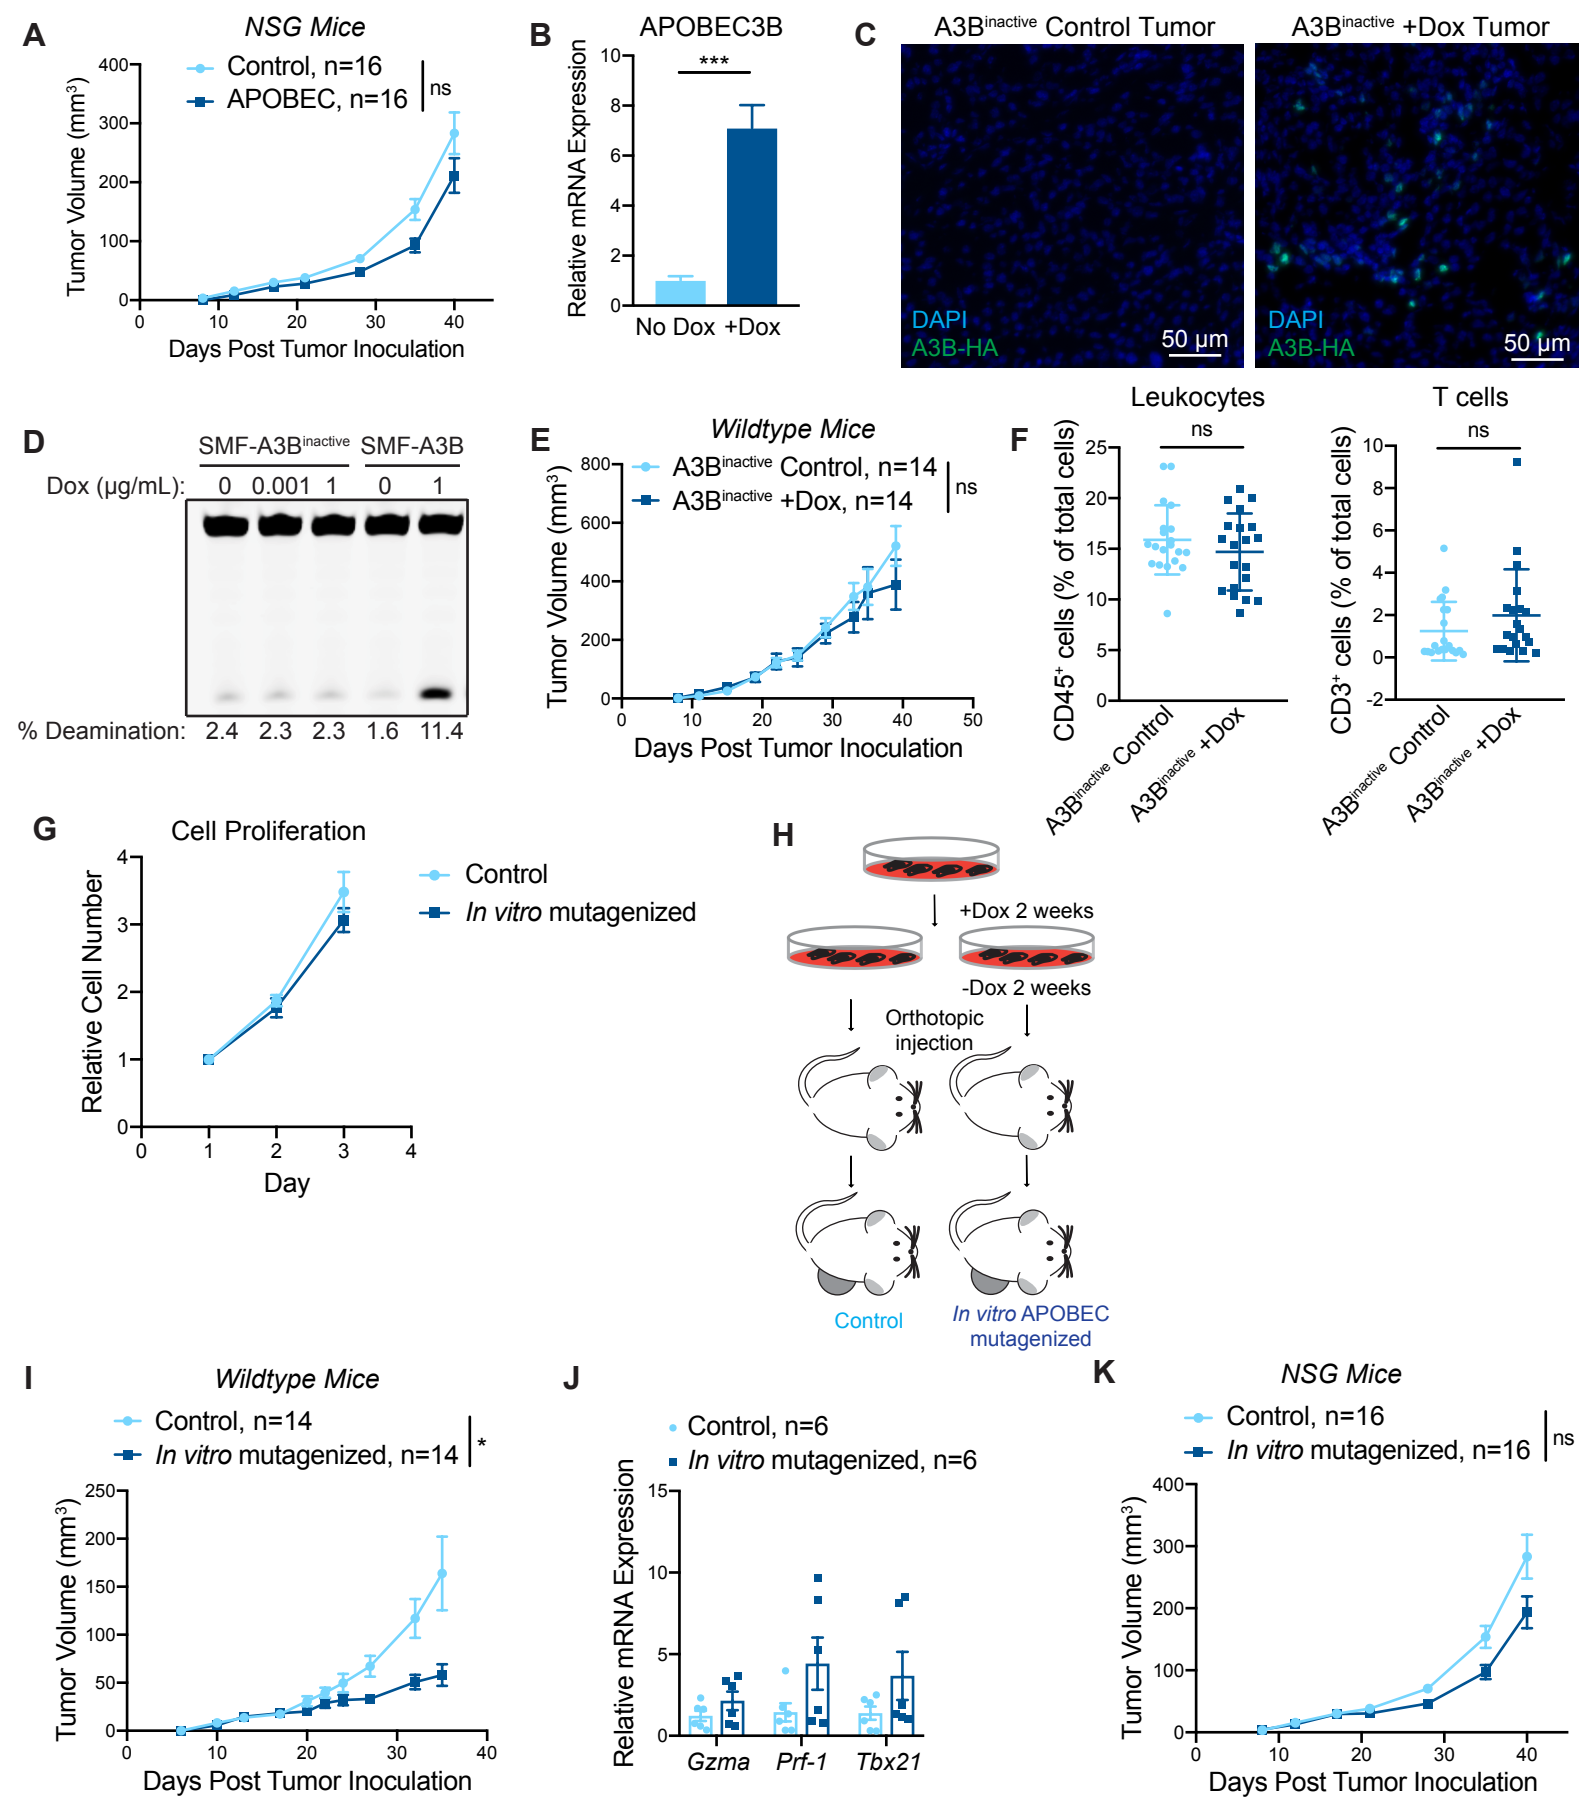

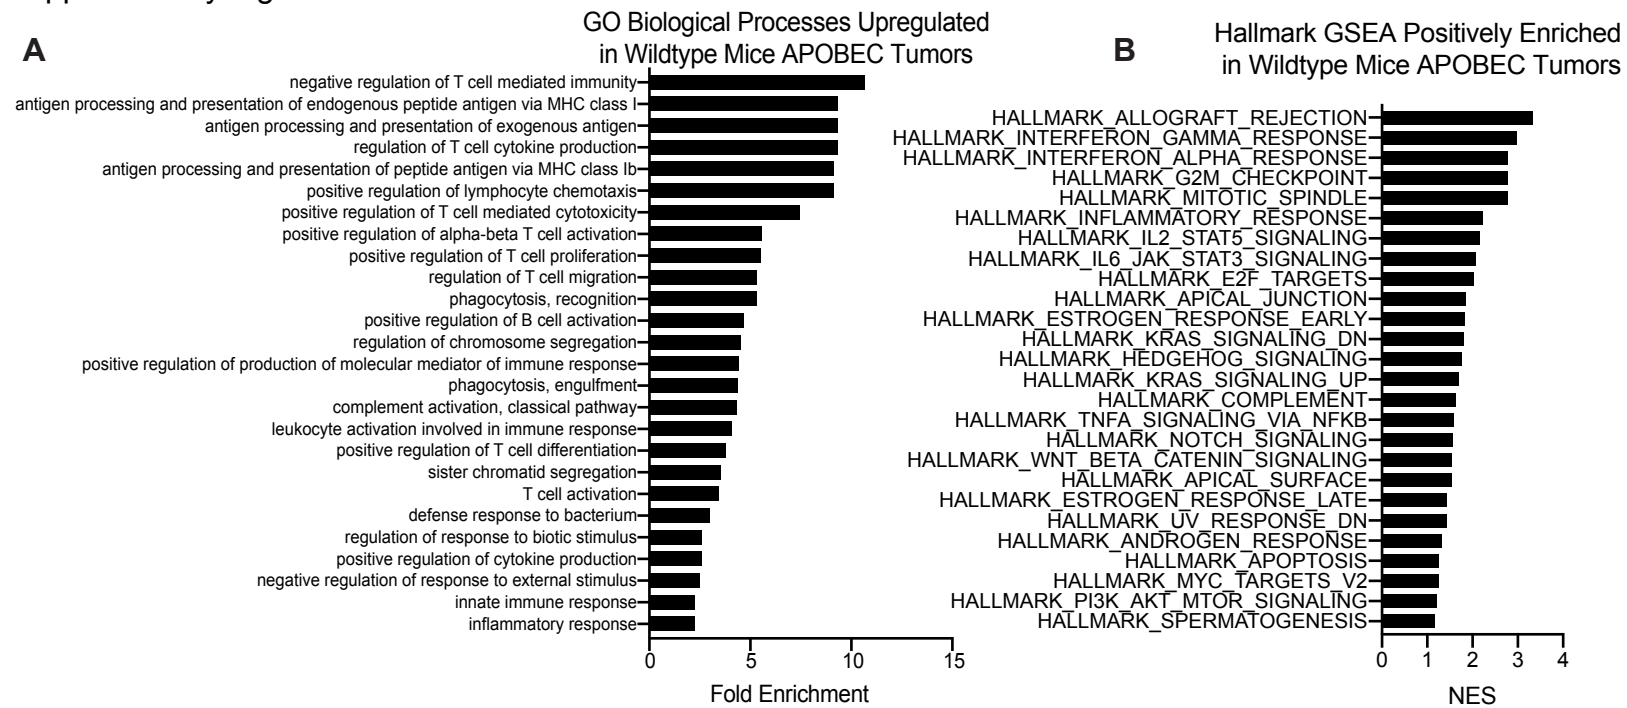

**C** Hallmark GSEA Positively Enriched in NSG Mice APOBEC Tumors

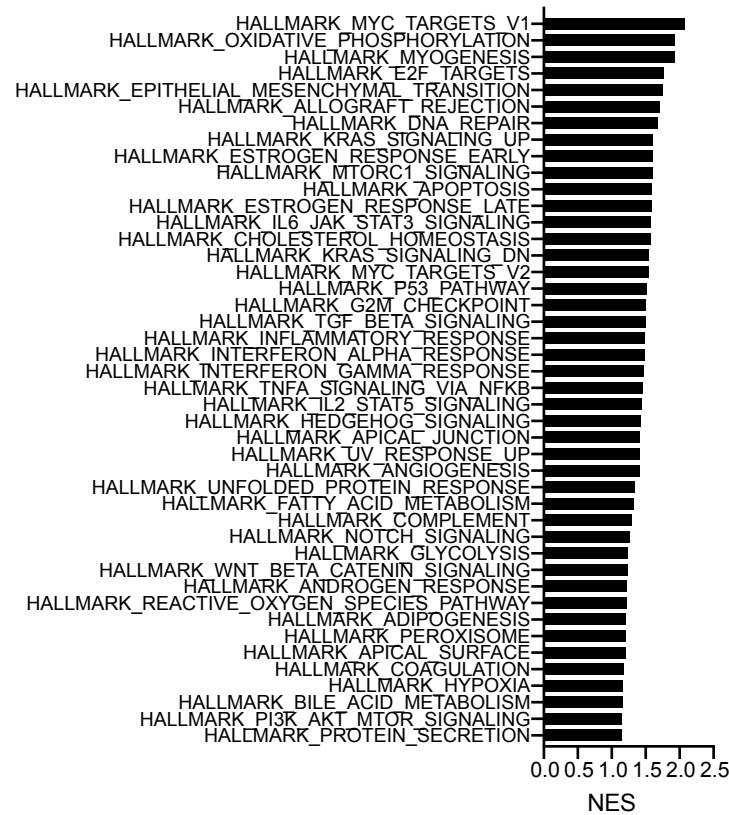

Supplementary Figure S8

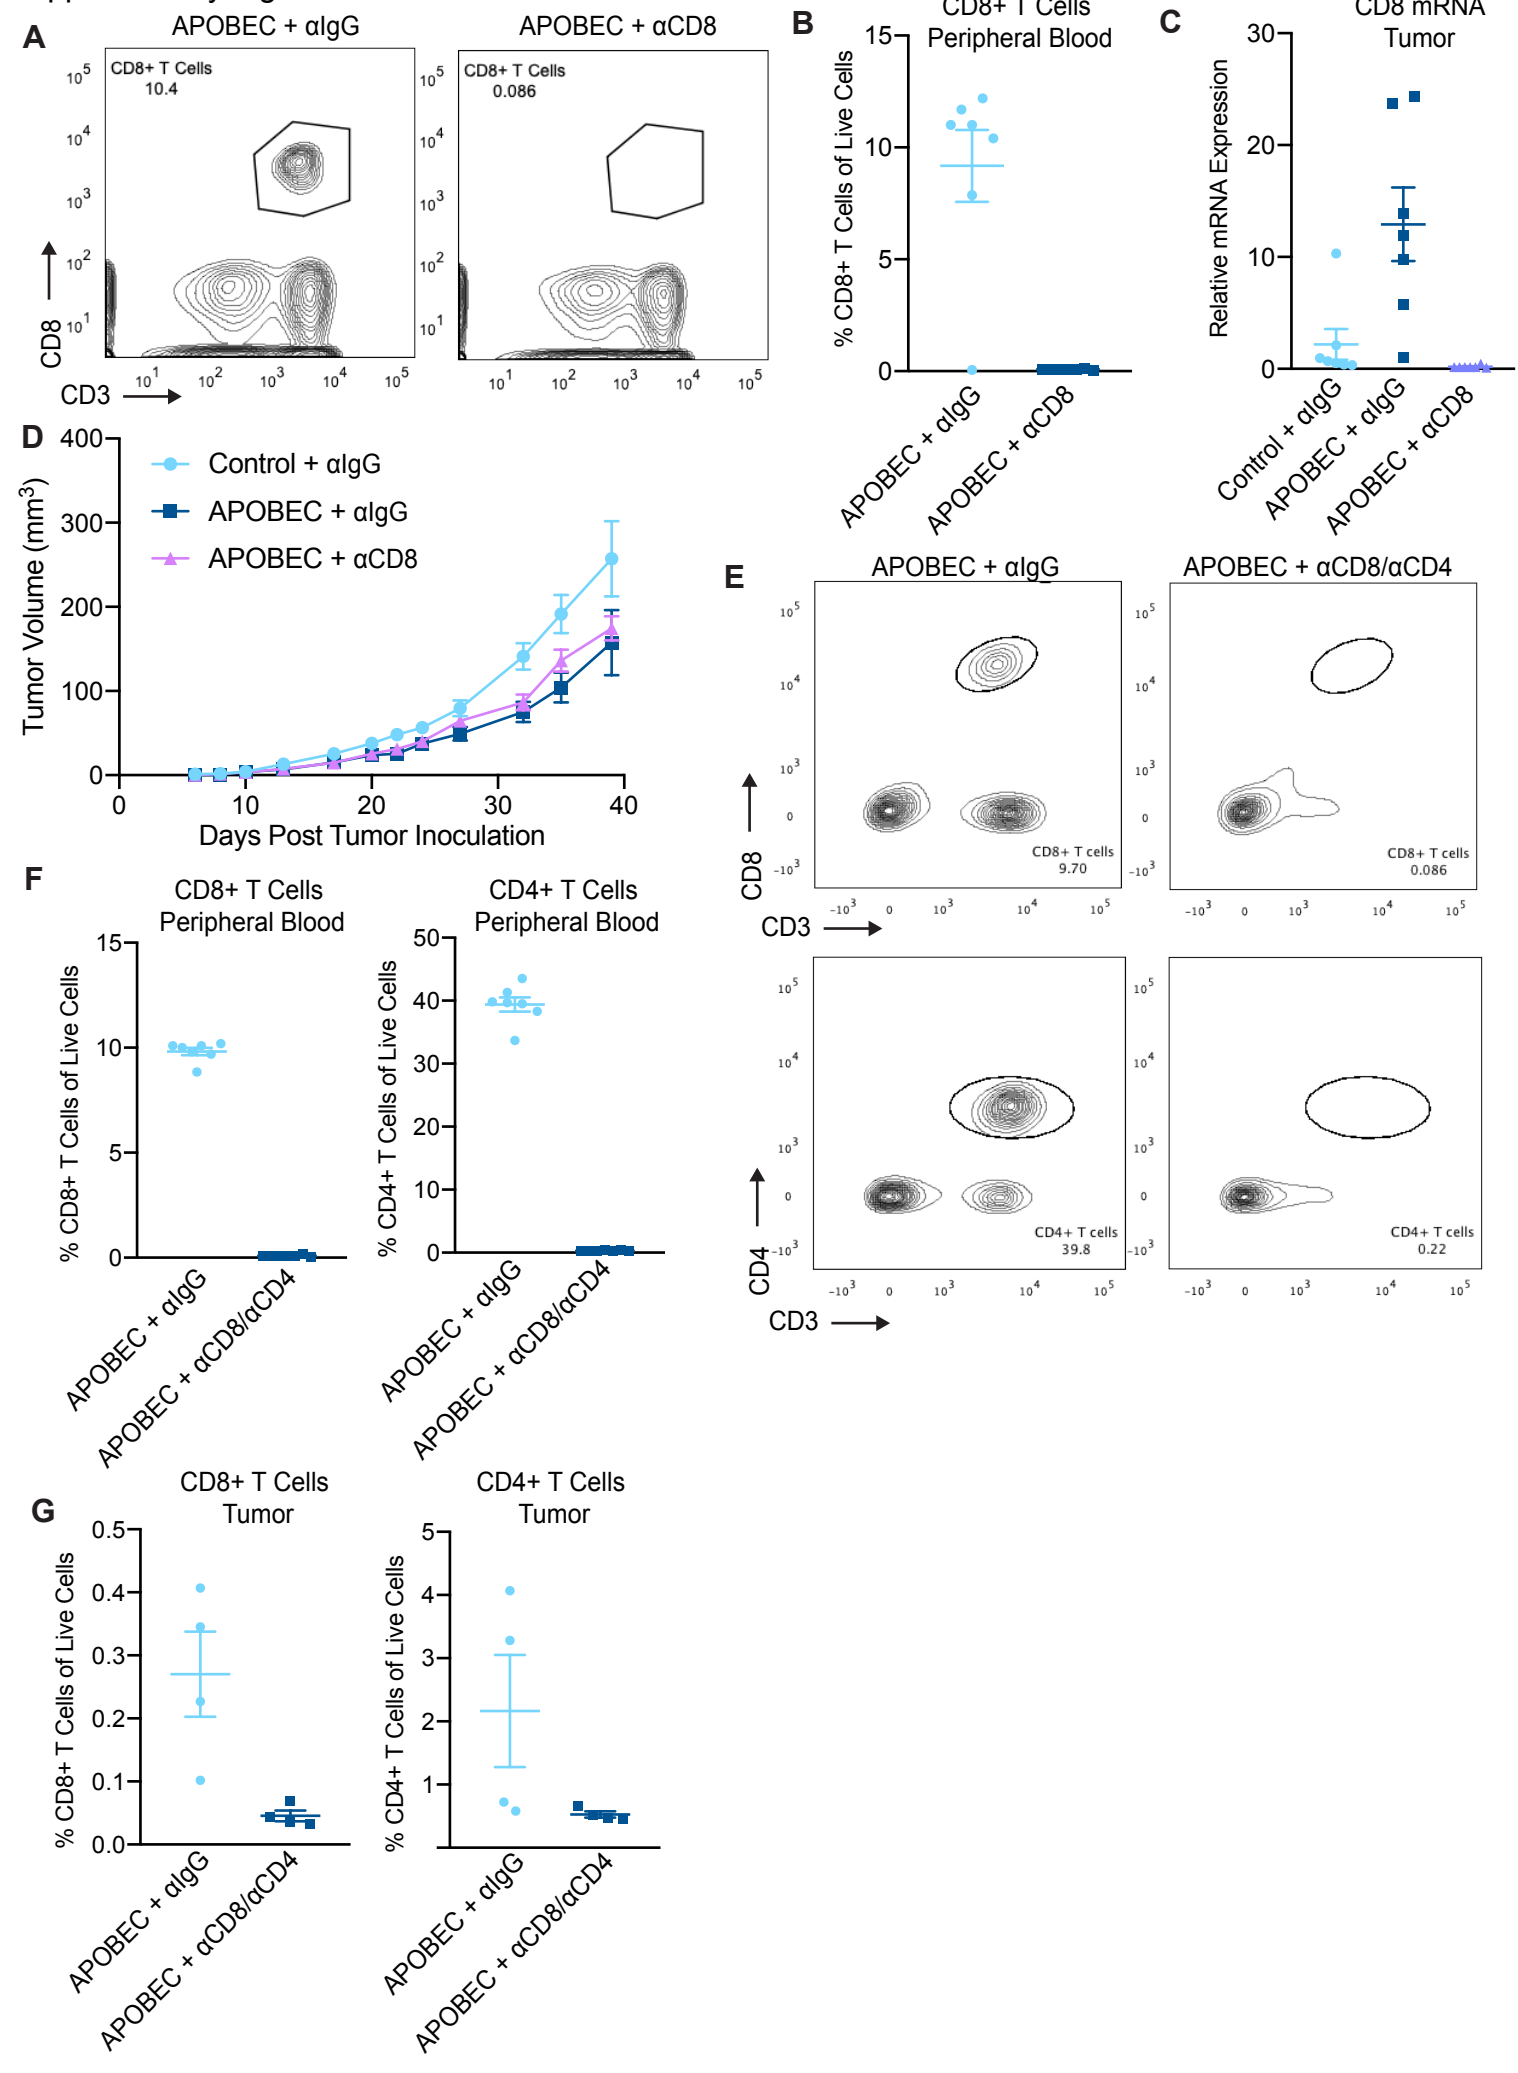



Supplementary Figure S9

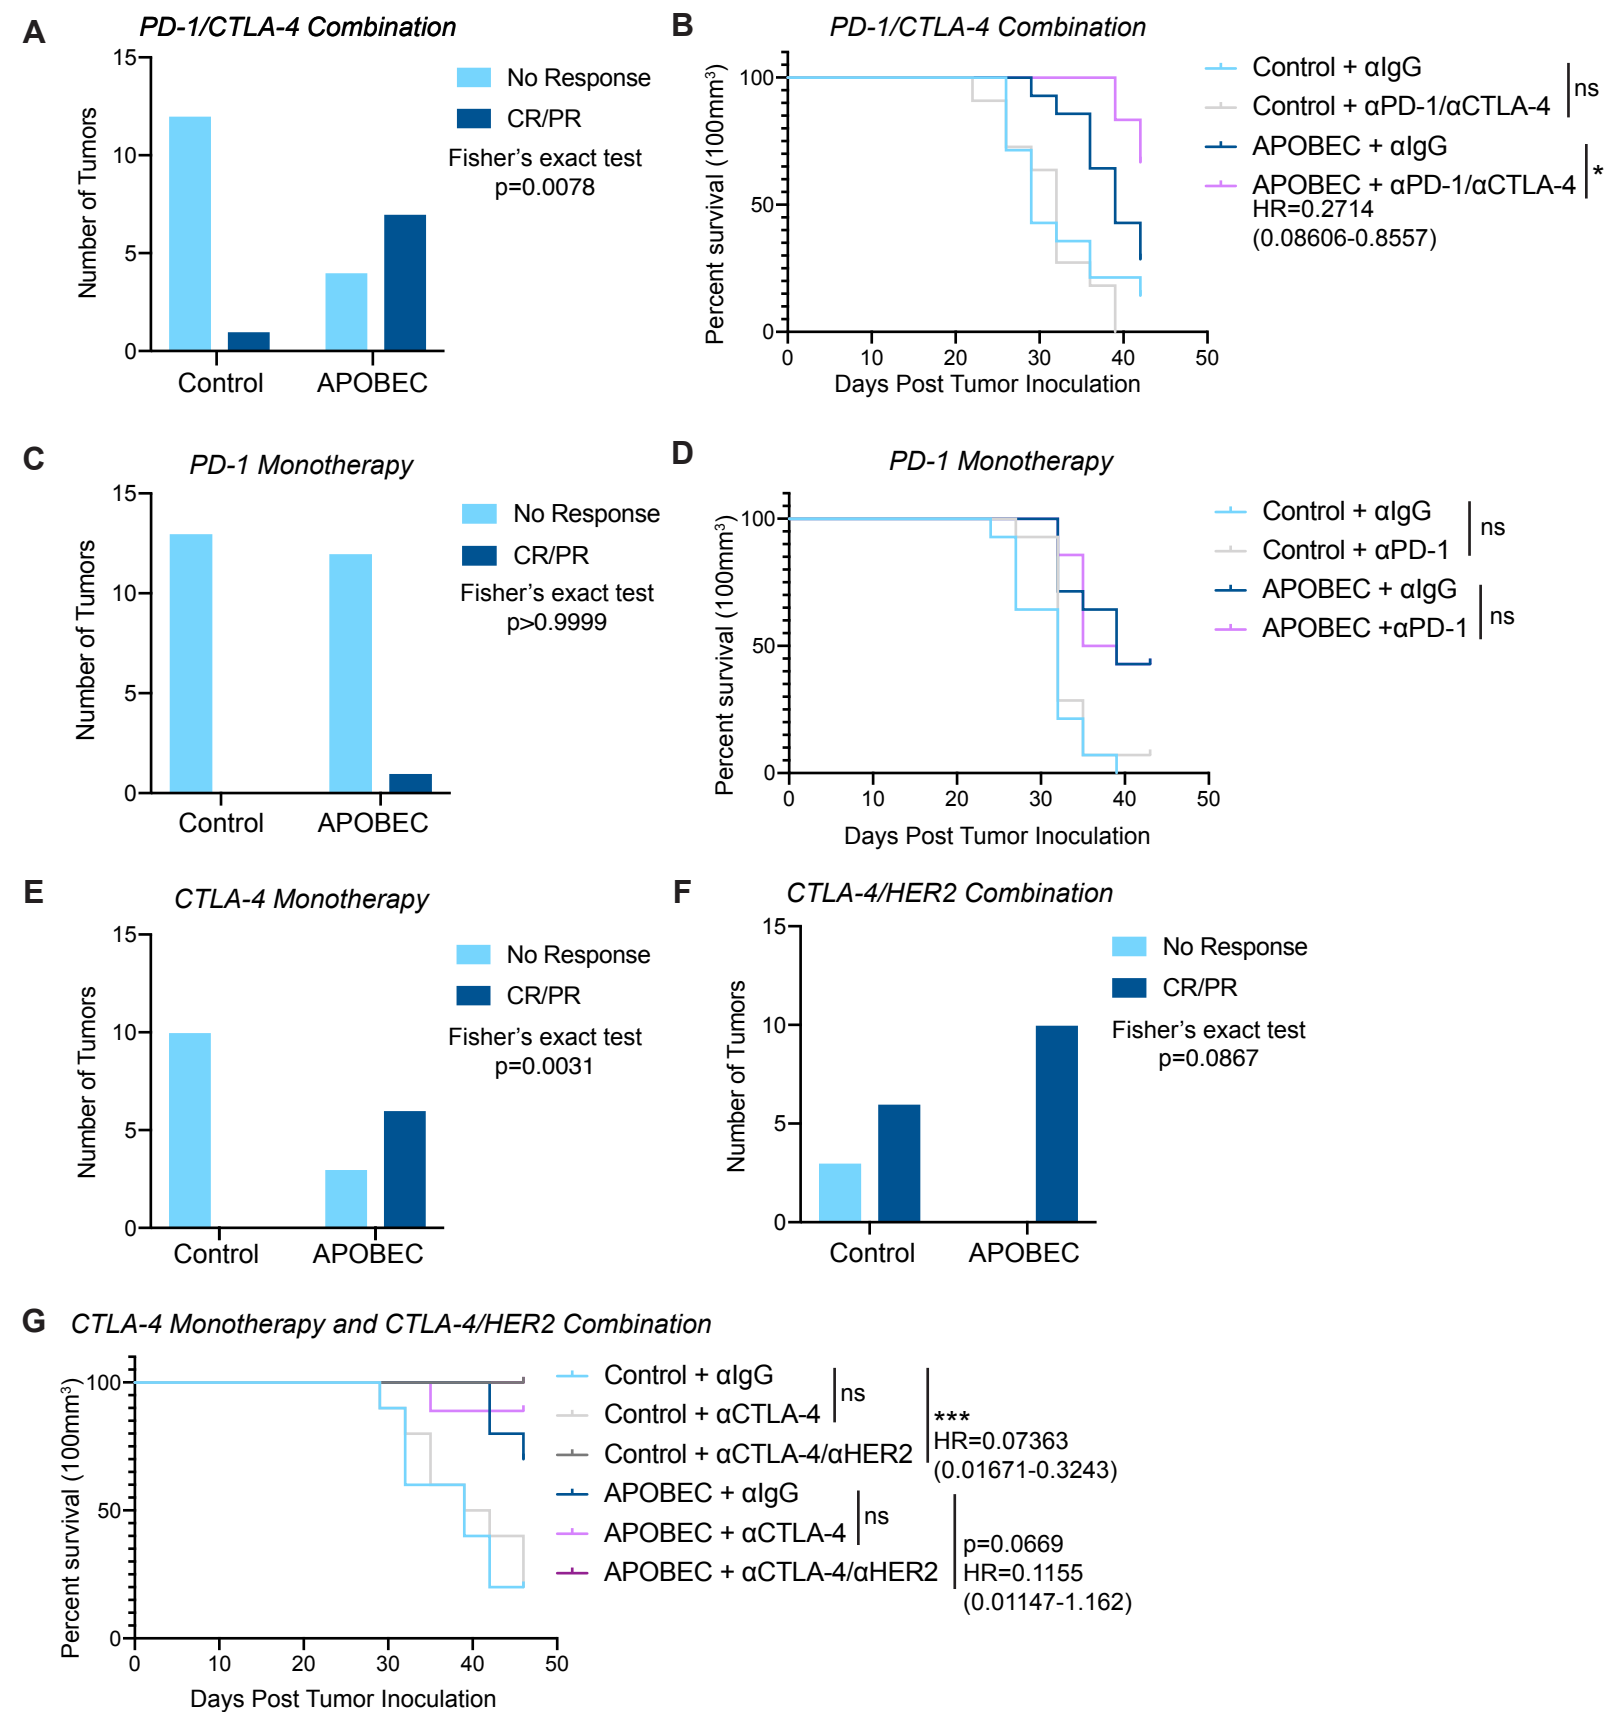

# Supplementary Figure S10

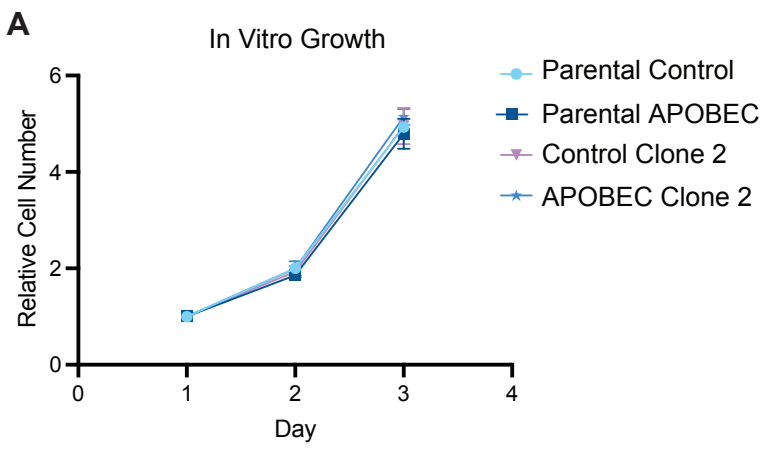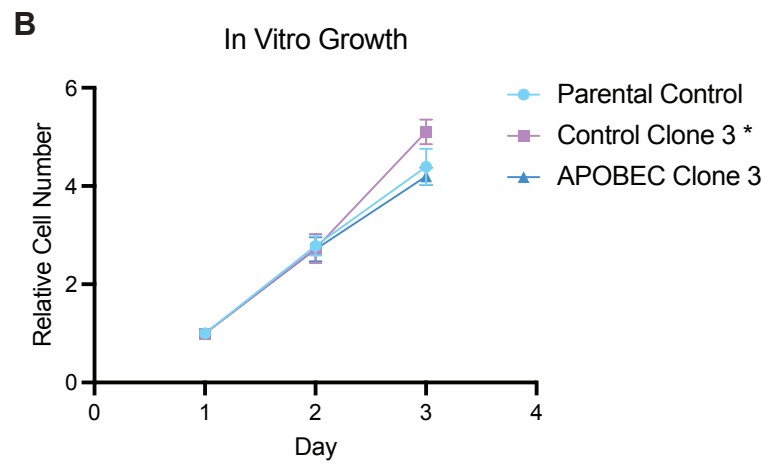

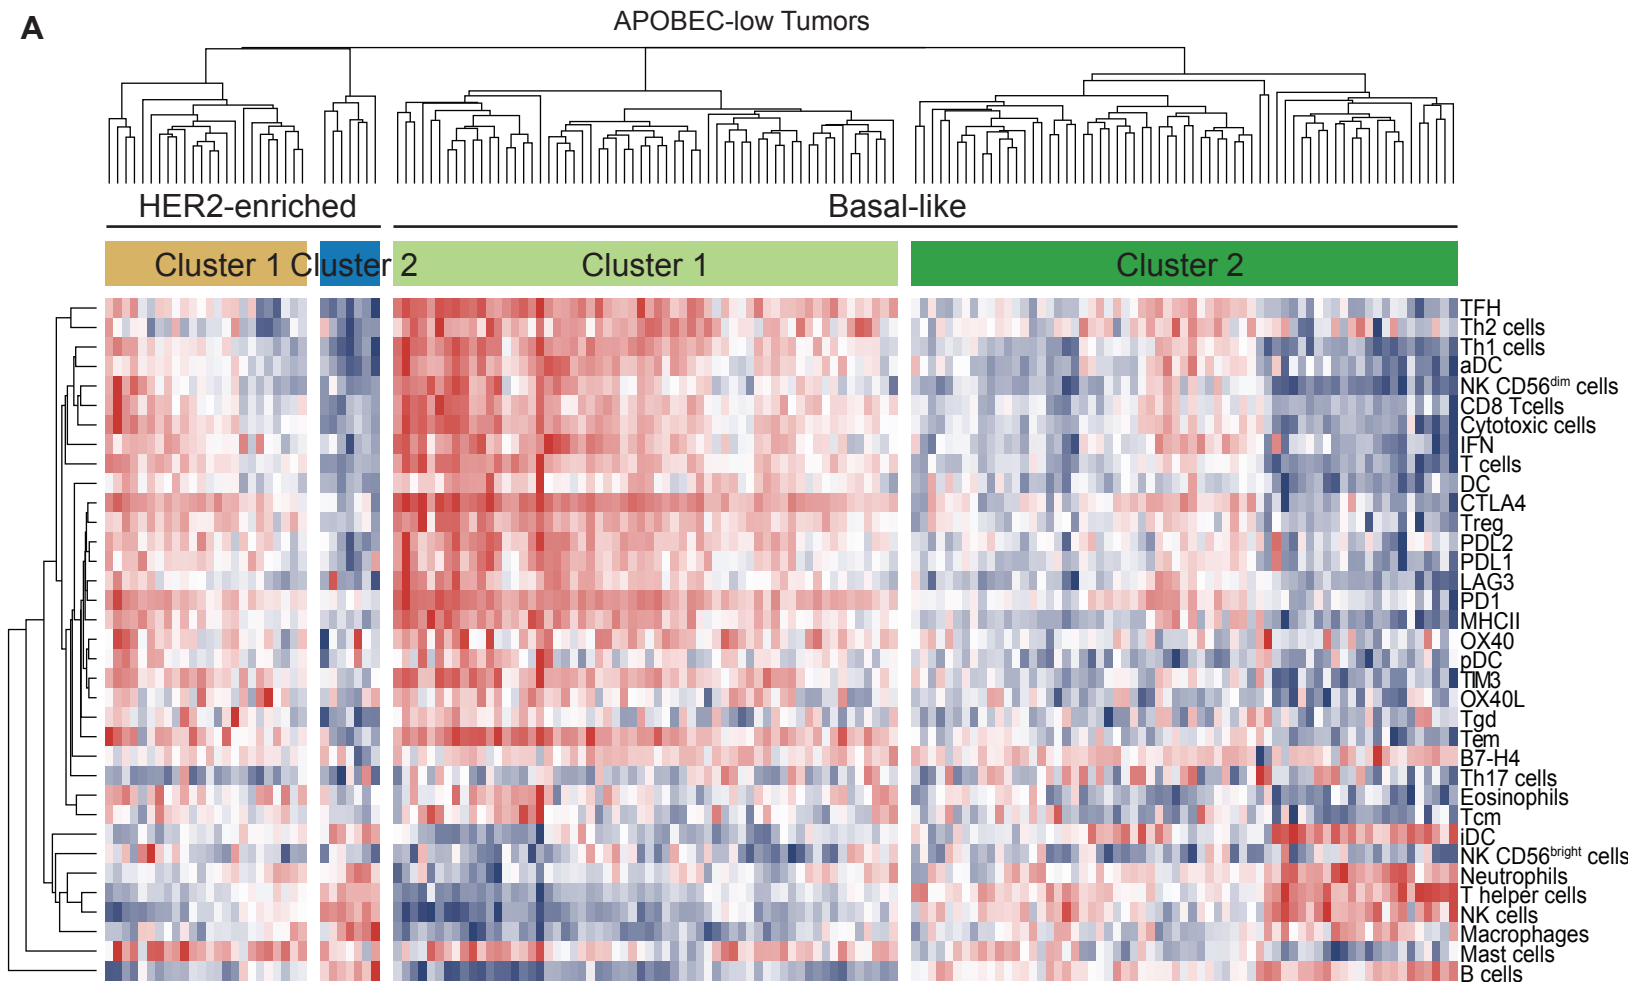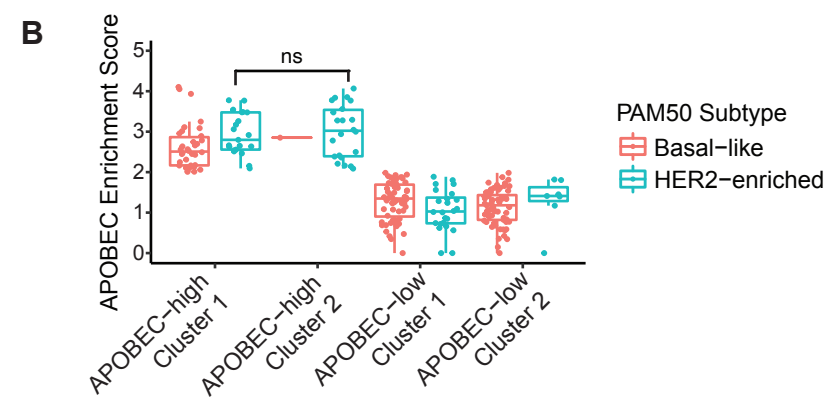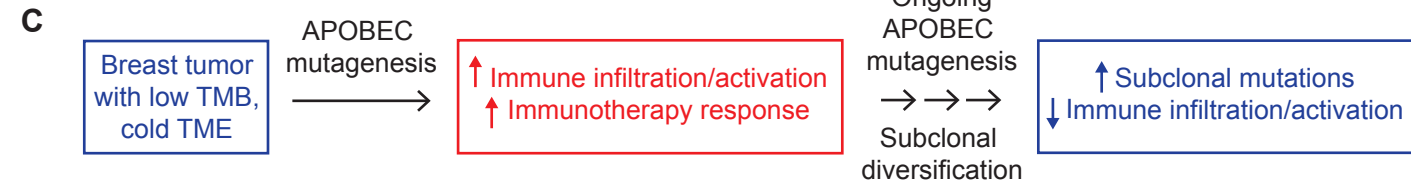

Supplement: NIHMS1759763-supplement-1.pdf [file NIHMS1759763-supplement-1.pdf]
